# Supplementary material for: Fermented carrot juice attenuates type 2 diabetes by mediating gut microbiota in rats
Source: Royal Society of Chemistry journal article supplement (doi:10.1039/c9fo00475k), 2019-01-01
Supplement: c9fo00475k1.pdf [file c9fo00475k1.pdf]

### Supplement material

**Table S1**

**Nutrient Composition in Carrot Juice<sup>a</sup>**

| <b>Condition</b>           | <b>Total Sugar<br/>(g/100ml)</b> | <b>Protein<br/>(g/100ml)</b> | <b>Fat<br/>(g/100ml)</b> | <b>Soluble Solid<br/>(g/100ml)</b> | <b>pH</b>  | <b>Moisture<br/>(g/100ml)</b> | <b>Water<br/>Activity</b> |
|----------------------------|----------------------------------|------------------------------|--------------------------|------------------------------------|------------|-------------------------------|---------------------------|
| Non-fermented carrot juice | 4.2±0.12                         | 0.37±0.01                    | <0.1                     | 6.1±0.1%                           | 6.5        | 72.84±0.01                    | 0.832±0.001               |
| Fermented carrot juice     | 3.39±0.21*                       | 0.44±0.02*                   | <0.1                     | 7.5±0.2%*                          | 4.01±0.17* | 69.64±0.58*                   | 0.841±0.004               |

<sup>a</sup>All data presented as means ± SD. \*represent  $p < 0.05$ , compared with non-fermented carrot juice.

**Fig. S1**

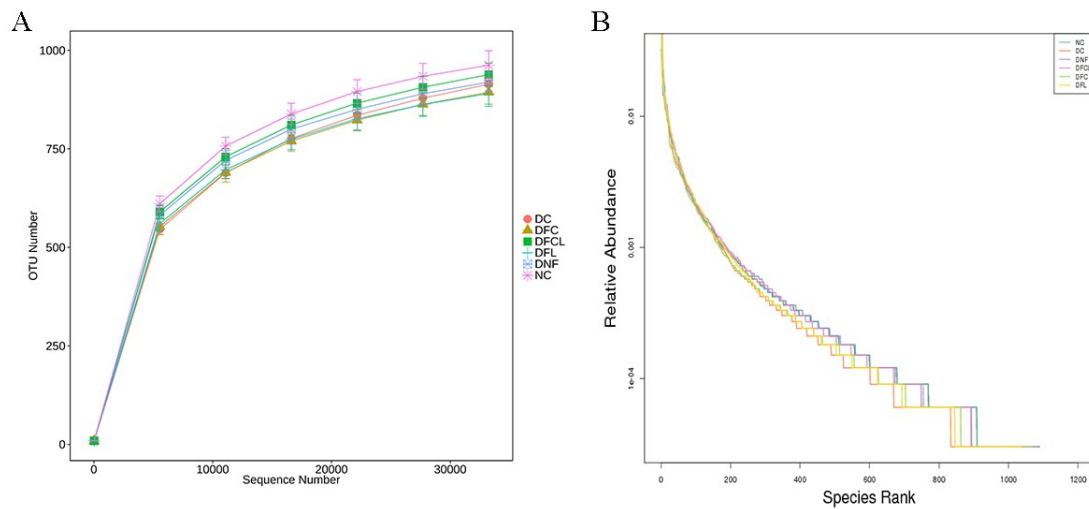

**Figure S1.** Alpha diversity analysis of the sequence reads. (A) Rarefaction curves of the experimentally observed OTUs versus. (B) Rank abundance curve of bacterial OTUs derived from each sample. Normal control (NC), diabetes control (DC), DC plus non-fermented carrot juice (DNF), DC plus fermented carrot juice with LGG (DFCL), DC plus fermented carrot juice (DFC), and DC plus  $10^9$  CFU/mL LGG (DFL).

**Fig. S2**

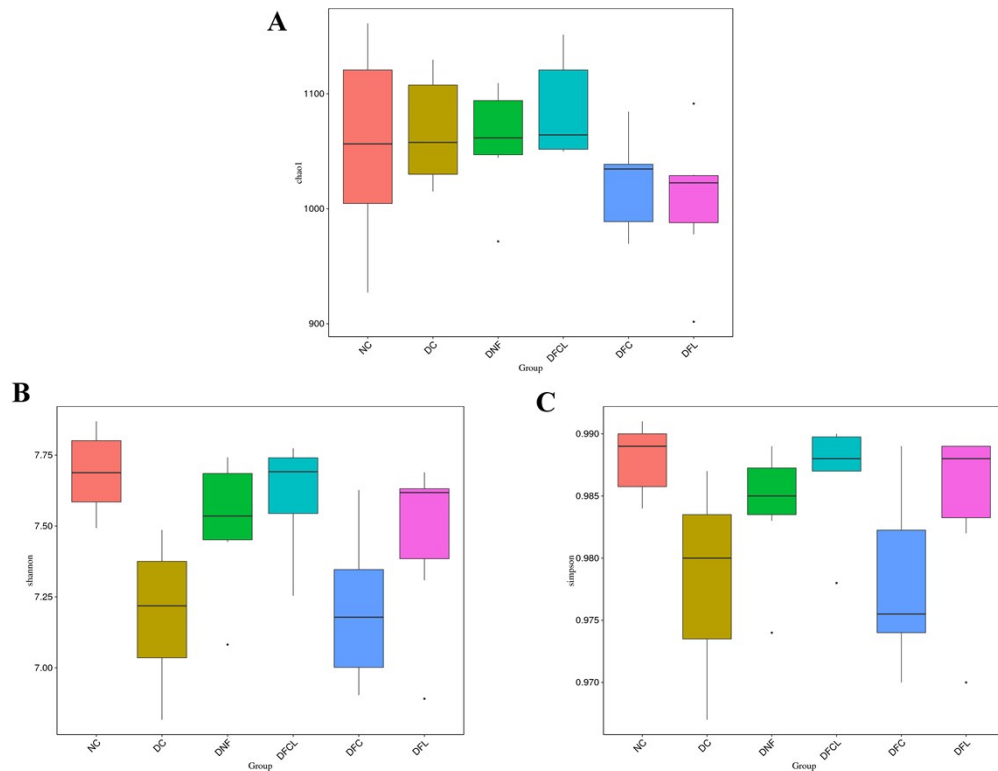

**Figure S2.** Changes in the alpha-diversity of gut microbial species. Box plots representing the changes in species Chao1 index (A), Shannon index (B) and Simpson index (C) are shown for each group of rats. Whiskers in the boxplots represent the range of minimum and maximum values within a group, excluding outliers. Boxplots denote top quartile, median, and bottom quartile. Normal control (NC), diabetes control (DC), DC plus non-fermented carrot juice (DNF), DC plus fermented carrot juice with LGG (DFCL), DC plus fermented carrot juice (DFC), and DC plus 10<sup>9</sup> CFU/mL LGG (DFL).
